# Supplementary material
Source: Research Square preprint supplement (doi:10.21203/rs.3.rs-8603363/v1)
Supplement: Supplementary file 1 [file 580dbddfdeecc5d651bd2500.docx]

| **UK Royal College Exam Name** | **Number of first attempts by course type** | | |
| --- | --- | --- | --- |
| **Graduate Entry Medicine** | **Medicine with a Gateway Year** | **Standard Entry Medicine** |
| Membership of the Royal Colleges of Physicians of the United Kingdom, Part 1 | 1255 | 130 | 10275 |
| Membership of the Royal College of General Practitioners, Applied Knowledge Test | 1000 | 180 | 7155 |
| Intercollegiate Membership of the Royal College of Surgeons, Part A – Multiple Choice Questions | 600 | 90 | 4570 |
| Membership of the Royal College of Paediatrics and Child Health, Foundation of Practice | 235 | 20 | 1915 |
| Membership of the Royal College of Emergency Medicine, Primary Examination | 165 | 15 | 1335 |
| Membership of the Royal College of Psychiatrists, Paper A | 195 | 15 | 1275 |
| Membership of the Royal College of Paediatrics and Child Health, Theory and Science Examination | 165 | 10 | 1265 |
| Royal College of Anaesthetists, Primary Fellowship Examination – Multiple Choice Questions | 215 | 15 | 1195 |
| Membership of the Royal College of Obstetricians and Gynaecologists, Part 1 | 120 | 20 | 935 |
| Royal College of Radiologists, First Fellowship Examination in Clinical Radiology – Anatomy | 70 | 15 | 570 |
| Royal College of Radiologists, First Fellowship Examination in Clinical Radiology – Physics | 65 | 15 | 550 |
| Fellowship of the Royal College of Ophthalmologists, Part 1 | 50 | 5 | 390 |
| Membership of the Royal College of Emergency Medicine, Part A Examination | 60 | 5 | 305 |

**Supplementary Table 1. UK Royal College exams included in the ‘Passed 1st Membership exam sat’ measure.**
